# Supplementary material for: Basis set convergence of the binding energies of strongly hydrogen-bonded atmospheric clusters
Source: Royal Society of Chemistry journal article supplement (doi:10.1039/c6cp06851k), 2016-11-30
Supplement: c6cp06851k2.pdf [file c6cp06851k2.pdf]

# Supporting Information

## Basis Set Convergence of the Binding Energies of Strongly Hydrogen-Bonded Atmospheric Clusters

Jonas Elm<sup>a,\*</sup> and Kasper Kristensen<sup>b</sup>

<sup>a</sup>*Division of Atmospheric Sciences, Department of Physics, Helsinki University, Finland.*

<sup>b</sup>*qLEAP Center for Theoretical Chemistry, Department of Chemistry, Aarhus University, Denmark.*

E-mail: [jonas.elm@helsinki.fi](mailto:jonas.elm@helsinki.fi)

# Cluster Structures

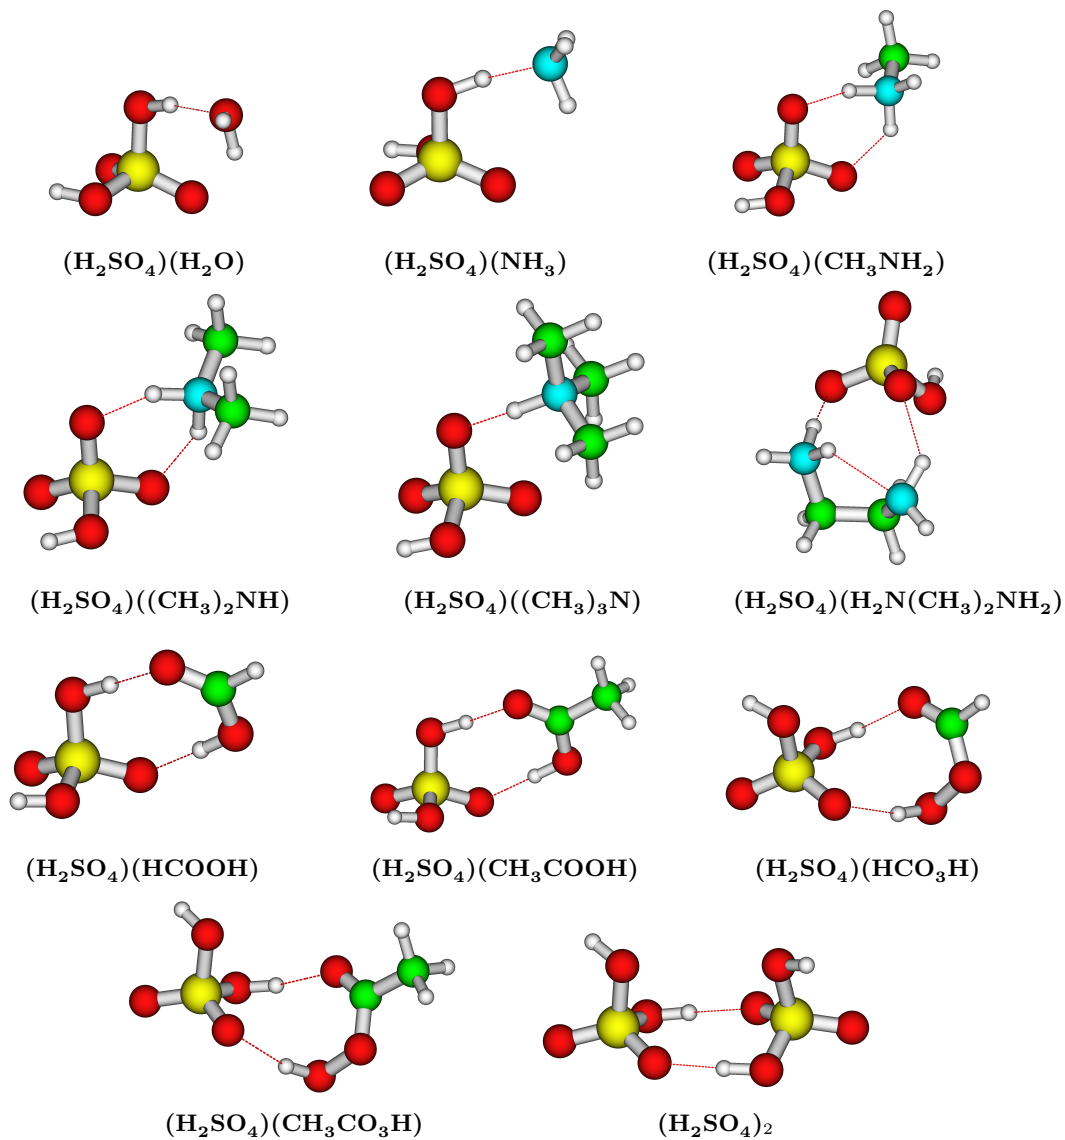

**Figure S1:** Minimum structures of the studied clusters optimized at the MP2/aug-cc-pVTZ level of theory. Color coding: yellow = sulfur, green = carbon, blue = nitrogen and white = hydrogen.

| Model                          | Basis | UC     | UC-F12 | CP     | CP-F12 | SNOOP  | SNOOP-F12 | EXTR   |
|--------------------------------|-------|--------|--------|--------|--------|--------|-----------|--------|
| MP2/int                        | DZ    | -14.14 | -13.91 | -11.91 | -13.58 | -12.67 | -13.64    | —      |
| MP2/int                        | TZ    | -14.22 | -13.92 | -13.09 | -13.78 | -13.35 | -13.81    | -13.23 |
| MP2/int                        | QZ    | -14.13 | -13.88 | -13.53 | -13.81 | -13.61 | -13.81    | -13.69 |
| MP2/rel                        | DZ    | 1.43   | 1.23   | —      | —      | —      | —         | —      |
| MP2/rel                        | TZ    | 1.25   | 1.25   | —      | —      | —      | —         | 1.25   |
| MP2/rel                        | QZ    | 1.28   | 1.25   | —      | —      | —      | —         | 1.28   |
| MP2/bind                       | DZ    | -12.71 | -12.67 | -10.48 | -12.35 | -11.24 | -12.41    | —      |
| MP2/bind                       | TZ    | -12.97 | -12.67 | -11.84 | -12.54 | -12.10 | -12.56    | -11.98 |
| MP2/bind                       | QZ    | -12.84 | -12.63 | -12.24 | -12.55 | -12.33 | -12.56    | -12.41 |
| $\Delta^{\text{int,CCSD(T)}}$  | DZ    | -0.03  | —      | 0.14   | —      | 0.06   | —         | —      |
| $\Delta^{\text{int,CCSD(T)}}$  | TZ    | -0.02  | —      | -0.03  | —      | -0.03  | —         | -0.05  |
| $\Delta^{\text{rel,CCSD(T)}}$  | DZ    | 0.01   | —      | —      | —      | —      | —         | —      |
| $\Delta^{\text{rel,CCSD(T)}}$  | TZ    | 0.01   | —      | —      | —      | —      | —         | 0.01   |
| $\Delta^{\text{bind,CCSD(T)}}$ | DZ    | -0.02  | —      | 0.15   | —      | 0.07   | —         | —      |
| $\Delta^{\text{bind,CCSD(T)}}$ | TZ    | -0.01  | —      | -0.01  | —      | -0.02  | —         | -0.04  |

**Table S1:** Interaction, relaxation, and binding energies for MP2 and the corresponding  $\Delta^{(\text{T})}$  contributions for the  $(\text{H}_2\text{SO}_4)(\text{H}_2\text{O})$  cluster. All values are in kcal/mol.

| Model                          | Basis | UC     | UC-F12 | CP     | CP-F12 | SNOOP  | SNOOP-F12 | EXTR   |
|--------------------------------|-------|--------|--------|--------|--------|--------|-----------|--------|
| MP2/int                        | DZ    | -20.87 | -20.77 | -18.23 | -20.37 | -19.23 | -20.46    | —      |
| MP2/int                        | TZ    | -20.90 | -20.73 | -19.72 | -20.58 | -19.98 | -20.60    | -19.89 |
| MP2/int                        | QZ    | -20.86 | -20.70 | -20.24 | -20.62 | -20.31 | -20.63    | -20.45 |
| MP2/rel                        | DZ    | 3.92   | 3.83   | —      | —      | —      | —         | —      |
| MP2/rel                        | TZ    | 3.85   | 3.90   | —      | —      | —      | —         | 3.86   |
| MP2/rel                        | QZ    | 3.94   | 3.92   | —      | —      | —      | —         | 3.96   |
| MP2/bind                       | DZ    | -16.95 | -16.95 | -14.31 | -16.54 | -15.31 | -16.63    | —      |
| MP2/bind                       | TZ    | -17.05 | -16.83 | -15.87 | -16.69 | -16.13 | -16.71    | -16.03 |
| MP2/bind                       | QZ    | -16.92 | -16.78 | -16.29 | -16.70 | -16.36 | -16.71    | -16.49 |
| $\Delta^{\text{int,CCSD(T)}}$  | DZ    | 0.53   | —      | 0.66   | —      | 0.60   | —         | —      |
| $\Delta^{\text{int,CCSD(T)}}$  | TZ    | 0.45   | —      | 0.41   | —      | 0.41   | —         | 0.37   |
| $\Delta^{\text{rel,CCSD(T)}}$  | DZ    | 0.04   | —      | —      | —      | —      | —         | —      |
| $\Delta^{\text{rel,CCSD(T)}}$  | TZ    | 0.06   | —      | —      | —      | —      | —         | 0.06   |
| $\Delta^{\text{bind,CCSD(T)}}$ | DZ    | 0.57   | —      | 0.70   | —      | 0.64   | —         | —      |
| $\Delta^{\text{bind,CCSD(T)}}$ | TZ    | 0.51   | —      | 0.47   | —      | 0.47   | —         | 0.44   |

**Table S2:** Interaction, relaxation, and binding energies for MP2 and the corresponding  $\Delta^{(\text{T})}$  contributions for the  $(\text{H}_2\text{SO}_4)(\text{NH}_3)$  cluster. All values are in kcal/mol.

| Model                          | Basis | UC     | UC-F12 | CP     | CP-F12 | SNOOP  | SNOOP-F12 | EXTR   |
|--------------------------------|-------|--------|--------|--------|--------|--------|-----------|--------|
| MP2/int                        | DZ    | -94.96 | -95.88 | -89.90 | -95.11 | -91.05 | -95.25    | —      |
| MP2/int                        | TZ    | -96.08 | -96.16 | -93.61 | -95.89 | -93.98 | -95.93    | -93.99 |
| MP2/int                        | QZ    | -96.28 | -96.20 | -95.02 | -96.08 | -95.14 | -96.09    | -95.52 |
| MP2/rel                        | DZ    | 73.16  | 74.10  | —      | —      | —      | —         | —      |
| MP2/rel                        | TZ    | 74.20  | 74.32  | —      | —      | —      | —         | 74.26  |
| MP2/rel                        | QZ    | 74.48  | 74.42  | —      | —      | —      | —         | 74.50  |
| MP2/bind                       | DZ    | -21.80 | -21.78 | -16.74 | -21.02 | -17.89 | -21.15    | —      |
| MP2/bind                       | TZ    | -21.88 | -21.85 | -19.41 | -21.57 | -19.78 | -21.61    | -19.73 |
| MP2/bind                       | QZ    | -21.80 | -21.79 | -20.54 | -21.66 | -20.66 | -21.67    | -21.02 |
| $\Delta^{\text{int,CCSD(T)}}$  | DZ    | 1.98   | —      | 2.19   | —      | 2.10   | —         | —      |
| $\Delta^{\text{int,CCSD(T)}}$  | TZ    | 1.52   | —      | 1.37   | —      | 1.38   | —         | 1.26   |
| $\Delta^{\text{rel,CCSD(T)}}$  | DZ    | -0.78  | —      | —      | —      | —      | —         | —      |
| $\Delta^{\text{rel,CCSD(T)}}$  | TZ    | -0.39  | —      | —      | —      | —      | —         | -0.34  |
| $\Delta^{\text{bind,CCSD(T)}}$ | DZ    | 1.20   | —      | 1.41   | —      | 1.33   | —         | —      |
| $\Delta^{\text{bind,CCSD(T)}}$ | TZ    | 1.13   | —      | 0.98   | —      | 0.99   | —         | 0.92   |

**Table S3:** Interaction, relaxation, and binding energies for MP2 and the corresponding  $\Delta^{(\text{T})}$  contributions for the  $(\text{H}_2\text{SO}_4)((\text{CH}_3)\text{NH}_2)$  cluster. All values are in kcal/mol.

| Model                          | Basis | UC      | UC-F12  | CP      | CP-F12  | SNOOP   | SNOOP-F12 | EXTR    |
|--------------------------------|-------|---------|---------|---------|---------|---------|-----------|---------|
| MP2/int                        | DZ    | -110.76 | -111.22 | -104.90 | -110.33 | -106.27 | -110.50   | —       |
| MP2/int                        | TZ    | -111.70 | -111.44 | -108.72 | -111.12 | -109.20 | -111.17   | -109.13 |
| MP2/int                        | QZ    | -111.68 | -111.46 | -110.20 | -111.31 | -110.34 | -111.33   | -110.72 |
| MP2/rel                        | DZ    | 84.29   | 85.52   | —       | —       | —       | —         | —       |
| MP2/rel                        | TZ    | 85.58   | 85.77   | —       | —       | —       | —         | 85.65   |
| MP2/rel                        | QZ    | 85.91   | 85.88   | —       | —       | —       | —         | 85.96   |
| MP2/bind                       | DZ    | -26.47  | -25.70  | -20.61  | -24.81  | -21.98  | -24.98    | —       |
| MP2/bind                       | TZ    | -26.12  | -25.68  | -23.13  | -25.35  | -23.61  | -25.40    | -23.48  |
| MP2/bind                       | QZ    | -25.77  | -25.58  | -24.29  | -25.44  | -24.43  | -25.45    | -24.77  |
| $\Delta^{\text{int,CCSD(T)}}$  | DZ    | 2.46    | —       | 2.70    | —       | 2.61    | —         | —       |
| $\Delta^{\text{int,CCSD(T)}}$  | TZ    | 1.89    | —       | 1.74    | —       | 1.75    | —         | 1.60    |
| $\Delta^{\text{rel,CCSD(T)}}$  | DZ    | -1.36   | —       | —       | —       | —       | —         | —       |
| $\Delta^{\text{rel,CCSD(T)}}$  | TZ    | -0.86   | —       | —       | —       | —       | —         | -0.79   |
| $\Delta^{\text{bind,CCSD(T)}}$ | DZ    | 1.10    | —       | 1.34    | —       | 1.25    | —         | —       |
| $\Delta^{\text{bind,CCSD(T)}}$ | TZ    | 1.03    | —       | 0.88    | —       | 0.89    | —         | 0.81    |

**Table S4:** Interaction, relaxation, and binding energies for MP2 and the corresponding  $\Delta^{(\text{T})}$  contributions for the  $(\text{H}_2\text{SO}_4)((\text{CH}_3)_2\text{NH})$  cluster. All values are in kcal/mol.

| Model                          | Basis | UC     | UC-F12 | CP     | CP-F12 | SNOOP  | SNOOP-F12 | EXTR   |
|--------------------------------|-------|--------|--------|--------|--------|--------|-----------|--------|
| MP2/int                        | DZ    | -90.06 | -89.03 | -83.26 | -88.00 | -85.29 | -88.20    | —      |
| MP2/int                        | TZ    | -89.86 | -89.04 | -86.54 | -88.68 | -87.18 | -88.74    | -86.92 |
| MP2/int                        | QZ    | -89.47 | -89.01 | -87.85 | -88.84 | -88.06 | -88.86    | -88.32 |
| MP2/rel                        | DZ    | 61.50  | 62.25  | —      | —      | —      | —         | —      |
| MP2/rel                        | TZ    | 62.31  | 62.51  | —      | —      | —      | —         | 62.37  |
| MP2/rel                        | QZ    | 62.63  | 62.60  | —      | —      | —      | —         | 62.67  |
| MP2/bind                       | DZ    | -28.56 | -26.78 | -21.76 | -25.75 | -23.79 | -25.95    | —      |
| MP2/bind                       | TZ    | -27.55 | -26.53 | -24.22 | -26.16 | -24.86 | -26.23    | -24.55 |
| MP2/bind                       | QZ    | -26.84 | -26.41 | -25.22 | -26.24 | -25.43 | -26.26    | -25.64 |
| $\Delta^{\text{int,CCSD(T)}}$  | DZ    | 1.68   | —      | 1.96   | —      | 1.82   | —         | —      |
| $\Delta^{\text{int,CCSD(T)}}$  | TZ    | 1.33   | —      | 1.19   | —      | 1.20   | —         | 1.08   |
| $\Delta^{\text{rel,CCSD(T)}}$  | DZ    | -0.61  | —      | —      | —      | —      | —         | —      |
| $\Delta^{\text{rel,CCSD(T)}}$  | TZ    | -0.32  | —      | —      | —      | —      | —         | -0.28  |
| $\Delta^{\text{bind,CCSD(T)}}$ | DZ    | 1.07   | —      | 1.36   | —      | 1.22   | —         | —      |
| $\Delta^{\text{bind,CCSD(T)}}$ | TZ    | 1.01   | —      | 0.87   | —      | 0.88   | —         | 0.80   |

**Table S5:** Interaction, relaxation, and binding energies for MP2 and the corresponding  $\Delta^{(\text{T})}$  contributions for the  $(\text{H}_2\text{SO}_4)((\text{CH}_3)_3\text{N})$  cluster. All values are in kcal/mol.

| Model                          | Basis | UC     | UC-F12 | CP     | CP-F12 | SNOOP  | SNOOP-F12 | EXTR   |
|--------------------------------|-------|--------|--------|--------|--------|--------|-----------|--------|
| MP2/int                        | DZ    | -94.42 | -93.86 | -87.86 | -92.94 | -89.73 | -93.12    | —      |
| MP2/int                        | TZ    | -94.56 | -94.01 | -91.45 | -93.67 | -92.01 | -93.73    | -91.82 |
| MP2/int                        | QZ    | -94.34 | -94.00 | -92.80 | -93.84 | -92.98 | -93.86    | -93.29 |
| MP2/rel                        | DZ    | 66.55  | 67.11  | —      | —      | —      | —         | —      |
| MP2/rel                        | TZ    | 67.25  | 67.32  | —      | —      | —      | —         | 67.29  |
| MP2/rel                        | QZ    | 67.50  | 67.42  | —      | —      | —      | —         | 67.53  |
| MP2/bind                       | DZ    | -27.87 | -26.75 | -21.31 | -25.84 | -23.19 | -26.01    | —      |
| MP2/bind                       | TZ    | -27.31 | -26.69 | -24.20 | -26.35 | -24.77 | -26.41    | -24.53 |
| MP2/bind                       | QZ    | -26.84 | -26.58 | -25.30 | -26.42 | -25.48 | -26.44    | -25.76 |
| $\Delta^{\text{int,CCSD(T)}}$  | DZ    | 1.69   | —      | 2.00   | —      | 1.86   | —         | —      |
| $\Delta^{\text{int,CCSD(T)}}$  | TZ    | 1.36   | —      | 1.23   | —      | 1.23   | —         | 1.12   |
| $\Delta^{\text{rel,CCSD(T)}}$  | DZ    | -0.49  | —      | —      | —      | —      | —         | —      |
| $\Delta^{\text{rel,CCSD(T)}}$  | TZ    | -0.17  | —      | —      | —      | —      | —         | -0.13  |
| $\Delta^{\text{bind,CCSD(T)}}$ | DZ    | 1.20   | —      | 1.51   | —      | 1.37   | —         | —      |
| $\Delta^{\text{bind,CCSD(T)}}$ | TZ    | 1.19   | —      | 1.06   | —      | 1.06   | —         | 0.99   |

**Table S6:** Interaction, relaxation, and binding energies for MP2 and the corresponding  $\Delta^{(\text{T})}$  contributions for the  $(\text{H}_2\text{SO}_4)(\text{H}_2\text{N}(\text{CH}_3)_2\text{NH}_2)$  cluster. All values are in kcal/mol.

| Model                          | Basis | UC     | UC-F12 | CP     | CP-F12 | SNOOP  | SNOOP-F12 | EXTR   |
|--------------------------------|-------|--------|--------|--------|--------|--------|-----------|--------|
| MP2/int                        | DZ    | -22.10 | -21.63 | -18.60 | -21.12 | -19.92 | -21.22    | —      |
| MP2/int                        | TZ    | -22.43 | -21.64 | -20.47 | -21.41 | -21.00 | -21.46    | -20.65 |
| MP2/int                        | QZ    | -22.12 | -21.56 | -21.07 | -21.43 | -21.23 | -21.45    | -21.28 |
| MP2/rel                        | DZ    | 4.52   | 3.90   | —      | —      | —      | —         | —      |
| MP2/rel                        | TZ    | 4.00   | 3.88   | —      | —      | —      | —         | 3.99   |
| MP2/rel                        | QZ    | 3.97   | 3.88   | —      | —      | —      | —         | 3.97   |
| MP2/bind                       | DZ    | -17.58 | -17.73 | -14.09 | -17.22 | -15.40 | -17.31    | —      |
| MP2/bind                       | TZ    | -18.44 | -17.76 | -16.47 | -17.53 | -17.00 | -17.58    | -16.65 |
| MP2/bind                       | QZ    | -18.15 | -17.68 | -17.10 | -17.56 | -17.26 | -17.57    | -17.32 |
| $\Delta^{\text{int,CCSD(T)}}$  | DZ    | -0.30  | —      | -0.04  | —      | -0.18  | —         | —      |
| $\Delta^{\text{int,CCSD(T)}}$  | TZ    | -0.25  | —      | -0.26  | —      | -0.28  | —         | -0.30  |
| $\Delta^{\text{rel,CCSD(T)}}$  | DZ    | 0.13   | —      | —      | —      | —      | —         | —      |
| $\Delta^{\text{rel,CCSD(T)}}$  | TZ    | 0.11   | —      | —      | —      | —      | —         | 0.11   |
| $\Delta^{\text{bind,CCSD(T)}}$ | DZ    | -0.18  | —      | 0.09   | —      | -0.05  | —         | —      |
| $\Delta^{\text{bind,CCSD(T)}}$ | TZ    | -0.14  | —      | -0.15  | —      | -0.17  | —         | -0.19  |

**Table S7:** Interaction, relaxation, and binding energies for MP2 and the corresponding  $\Delta^{\text{(T)}}$  contributions for the  $(\text{H}_2\text{SO}_4)(\text{HCOOH})$  cluster. All values are in kcal/mol.

| Model                          | Basis | UC     | UC-F12 | CP     | CP-F12 | SNOOP  | SNOOP-F12 | EXTR   |
|--------------------------------|-------|--------|--------|--------|--------|--------|-----------|--------|
| MP2/int                        | DZ    | -23.69 | -23.06 | -19.93 | -22.54 | -21.37 | -22.64    | —      |
| MP2/int                        | TZ    | -23.95 | -23.07 | -21.85 | -22.83 | -22.40 | -22.88    | -22.03 |
| MP2/int                        | QZ    | -23.58 | -22.99 | -22.47 | -22.85 | -22.65 | -22.87    | -22.69 |
| MP2/rel                        | DZ    | 5.22   | 4.60   | —      | —      | —      | —         | —      |
| MP2/rel                        | TZ    | 4.70   | 4.59   | —      | —      | —      | —         | 4.70   |
| MP2/rel                        | QZ    | 4.69   | 4.59   | —      | —      | —      | —         | 4.68   |
| MP2/bind                       | DZ    | -18.47 | -18.46 | -14.71 | -17.94 | -16.15 | -18.03    | —      |
| MP2/bind                       | TZ    | -19.25 | -18.48 | -17.14 | -18.24 | -17.70 | -18.29    | -17.33 |
| MP2/bind                       | QZ    | -18.89 | -18.40 | -17.78 | -18.26 | -17.96 | -18.28    | -18.01 |
| $\Delta^{\text{int,CCSD(T)}}$  | DZ    | -0.34  | —      | -0.07  | —      | -0.21  | —         | —      |
| $\Delta^{\text{int,CCSD(T)}}$  | TZ    | -0.28  | —      | -0.31  | —      | -0.32  | —         | -0.34  |
| $\Delta^{\text{rel,CCSD(T)}}$  | DZ    | 0.12   | —      | —      | —      | —      | —         | —      |
| $\Delta^{\text{rel,CCSD(T)}}$  | TZ    | 0.11   | —      | —      | —      | —      | —         | 0.11   |
| $\Delta^{\text{bind,CCSD(T)}}$ | DZ    | -0.22  | —      | 0.05   | —      | -0.09  | —         | —      |
| $\Delta^{\text{bind,CCSD(T)}}$ | TZ    | -0.17  | —      | -0.20  | —      | -0.21  | —         | -0.23  |

**Table S8:** Interaction, relaxation, and binding energies for MP2 and the corresponding  $\Delta^{\text{(T)}}$  contributions for the  $(\text{H}_2\text{SO}_4)(\text{CH}_3\text{COOH})$  cluster. All values are in kcal/mol.

| Model                          | Basis | UC     | UC-F12 | CP     | CP-F12 | SNOOP  | SNOOP-F12 | EXTR   |
|--------------------------------|-------|--------|--------|--------|--------|--------|-----------|--------|
| MP2/int                        | DZ    | -20.12 | -18.81 | -16.23 | -18.36 | -17.65 | -18.44    | —      |
| MP2/int                        | TZ    | -19.78 | -18.87 | -17.81 | -18.66 | -18.34 | -18.70    | -17.98 |
| MP2/int                        | QZ    | -19.36 | -18.80 | -18.35 | -18.67 | -18.52 | -18.69    | -18.54 |
| MP2/rel                        | DZ    | 5.51   | 5.72   | —      | —      | —      | —         | —      |
| MP2/rel                        | TZ    | 5.55   | 5.71   | —      | —      | —      | —         | 5.59   |
| MP2/rel                        | QZ    | 5.67   | 5.69   | —      | —      | —      | —         | 5.72   |
| MP2/bind                       | DZ    | -14.62 | -13.09 | -10.72 | -12.64 | -12.15 | -12.71    | —      |
| MP2/bind                       | TZ    | -14.23 | -13.17 | -12.26 | -12.95 | -12.78 | -13.00    | -12.39 |
| MP2/bind                       | QZ    | -13.69 | -13.11 | -12.67 | -12.98 | -12.85 | -13.00    | -12.82 |
| $\Delta^{\text{int,CCSD(T)}}$  | DZ    | -0.63  | —      | -0.29  | —      | -0.44  | —         | —      |
| $\Delta^{\text{int,CCSD(T)}}$  | TZ    | -0.48  | —      | -0.48  | —      | -0.49  | —         | -0.50  |
| $\Delta^{\text{rel,CCSD(T)}}$  | DZ    | 0.15   | —      | —      | —      | —      | —         | —      |
| $\Delta^{\text{rel,CCSD(T)}}$  | TZ    | 0.15   | —      | —      | —      | —      | —         | 0.14   |
| $\Delta^{\text{bind,CCSD(T)}}$ | DZ    | -0.47  | —      | -0.14  | —      | -0.29  | —         | —      |
| $\Delta^{\text{bind,CCSD(T)}}$ | TZ    | -0.33  | —      | -0.33  | —      | -0.35  | —         | -0.36  |

**Table S9:** Interaction, relaxation, and binding energies for MP2 and the corresponding  $\Delta^{\text{(T)}}$  contributions for the  $(\text{H}_2\text{SO}_4)(\text{HCO}_3\text{H})$  cluster. All values are in kcal/mol.

| Model                          | Basis | UC     | UC-F12 | CP     | CP-F12 | SNOOP  | SNOOP-F12 | EXTR   |
|--------------------------------|-------|--------|--------|--------|--------|--------|-----------|--------|
| MP2/int                        | DZ    | -21.83 | -20.39 | -17.69 | -19.91 | -19.19 | -19.99    | —      |
| MP2/int                        | TZ    | -21.45 | -20.45 | -19.33 | -20.21 | -19.88 | -20.26    | -19.51 |
| MP2/int                        | QZ    | -20.96 | -20.36 | -19.89 | -20.23 | -20.08 | -20.25    | -20.09 |
| MP2/rel                        | DZ    | 7.02   | 7.08   | —      | —      | —      | —         | —      |
| MP2/rel                        | TZ    | 6.99   | 7.07   | —      | —      | —      | —         | 7.02   |
| MP2/rel                        | QZ    | 7.05   | 7.05   | —      | —      | —      | —         | 7.09   |
| MP2/bind                       | DZ    | -14.82 | -13.31 | -10.68 | -12.83 | -12.17 | -12.91    | —      |
| MP2/bind                       | TZ    | -14.47 | -13.37 | -12.34 | -13.14 | -12.90 | -13.19    | -12.49 |
| MP2/bind                       | QZ    | -13.91 | -13.31 | -12.83 | -13.18 | -13.03 | -13.20    | -13.00 |
| $\Delta^{\text{int,CCSD(T)}}$  | DZ    | -0.65  | —      | -0.31  | —      | -0.46  | —         | —      |
| $\Delta^{\text{int,CCSD(T)}}$  | TZ    | -0.49  | —      | -0.50  | —      | -0.51  | —         | -0.53  |
| $\Delta^{\text{rel,CCSD(T)}}$  | DZ    | 0.14   | —      | —      | —      | —      | —         | —      |
| $\Delta^{\text{rel,CCSD(T)}}$  | TZ    | 0.12   | —      | —      | —      | —      | —         | 0.11   |
| $\Delta^{\text{bind,CCSD(T)}}$ | DZ    | -0.51  | —      | -0.17  | —      | -0.32  | —         | —      |
| $\Delta^{\text{bind,CCSD(T)}}$ | TZ    | -0.38  | —      | -0.38  | —      | -0.40  | —         | -0.41  |

**Table S10:** Interaction, relaxation, and binding energies for MP2 and the corresponding  $\Delta^{\text{(T)}}$  contributions for the  $(\text{H}_2\text{SO}_4)(\text{CH}_3\text{CO}_3\text{H})$  cluster. All values are in kcal/mol.

| Model                          | Basis | UC     | UC-F12 | CP     | CP-F12 | SNOOP  | SNOOP-F12 | EXTR   |
|--------------------------------|-------|--------|--------|--------|--------|--------|-----------|--------|
| MP2/int                        | DZ    | -22.41 | -21.10 | -18.15 | -20.52 | -19.71 | -20.62    | —      |
| MP2/int                        | TZ    | -22.41 | -21.10 | -20.06 | -20.83 | -20.72 | -20.89    | -20.23 |
| MP2/int                        | QZ    | -21.83 | -20.99 | -20.59 | -20.84 | -20.82 | -20.85    | -20.78 |
| MP2/rel                        | DZ    | 4.85   | 3.47   | —      | —      | —      | —         | —      |
| MP2/rel                        | TZ    | 3.64   | 3.31   | —      | —      | —      | —         | 3.62   |
| MP2/rel                        | QZ    | 3.45   | 3.27   | —      | —      | —      | —         | 3.42   |
| MP2/bind                       | DZ    | -17.57 | -17.64 | -13.30 | -17.05 | -14.87 | -17.15    | —      |
| MP2/bind                       | TZ    | -18.77 | -17.79 | -16.42 | -17.53 | -17.08 | -17.58    | -16.61 |
| MP2/bind                       | QZ    | -18.39 | -17.72 | -17.14 | -17.56 | -17.37 | -17.58    | -17.36 |
| $\Delta^{\text{int,CCSD(T)}}$  | DZ    | -0.51  | —      | -0.14  | —      | -0.32  | —         | —      |
| $\Delta^{\text{int,CCSD(T)}}$  | TZ    | -0.35  | —      | -0.33  | —      | -0.35  | —         | -0.35  |
| $\Delta^{\text{rel,CCSD(T)}}$  | DZ    | 0.07   | —      | —      | —      | —      | —         | —      |
| $\Delta^{\text{rel,CCSD(T)}}$  | TZ    | 0.04   | —      | —      | —      | —      | —         | 0.04   |
| $\Delta^{\text{bind,CCSD(T)}}$ | DZ    | -0.45  | —      | -0.08  | —      | -0.25  | —         | —      |
| $\Delta^{\text{bind,CCSD(T)}}$ | TZ    | -0.30  | —      | -0.28  | —      | -0.30  | —         | -0.31  |

**Table S11:** Interaction, relaxation, and binding energies for MP2 and the corresponding  $\Delta^{(\text{T})}$  contributions for the  $(\text{H}_2\text{SO}_4)_2$  cluster. All values are in kcal/mol.
